# Supplementary material for: Use of Dieselized Farm Equipment and Incident Lung Cancer: Findings from the Agricultural Health Study Cohort
Source: PubMed Central journal article supplement (PMC4858397; doi:10.1289/ehp.1409238), 2015-10-09
Supplement: ehp.1409238.s001.acco.pdf [file ehp.1409238.s001.acco.pdf]

**Note to readers with disabilities:** *EHP* strives to ensure that all journal content is accessible to all readers. However, some figures and Supplemental Material published in *EHP* articles may not conform to [508 standards](#) due to the complexity of the information being presented. If you need assistance accessing journal content, please contact [ehp508@niehs.nih.gov](mailto:ehp508@niehs.nih.gov). Our staff will work with you to assess and meet your accessibility needs within 3 working days.

## **Supplemental Material**

### **Use of Dieselized Farm Equipment and Incident Lung Cancer: Findings from the Agricultural Health Study Cohort**

Séverine Tual, Debra T. Silverman, Stella Koutros, Aaron Blair, Dale P. Sandler, Pierre Lebailly, Gabriella Andreotti, Jane A. Hoppin, and Laura E. Beane Freeman

#### **Table of Contents**

**Table S1.** Associations between driving farm equipment and the overall lung cancer risk, mutually adjusted for the use of diesel and gasoline tractors, among farmers and female spouses of farmers, Agricultural Health Study

**Table S2.** Associations between driving farm equipment and the overall lung cancer risk, mutually adjusted for the use of diesel and gasoline tractors, by exposure to endotoxin-related activities, among farmers and female spouses of farmers, Agricultural Health Study

**Table S3.** Associations between driving farm equipment and lung cancer histological subtypes, mutually adjusted for the use of diesel and gasoline tractors, among farmers and female spouses of farmers, Agricultural Health Study

**Table S4.** Associations between driving farm equipment and risk for lung adenocarcinoma, mutually adjusted for the use of diesel and gasoline tractors, by exposure to endotoxin-related activities, among farmers and female spouses of farmers, Agricultural Health Study

**Table S1.** Associations between driving farm equipment and the overall lung cancer risk, mutually adjusted for the use of diesel and gasoline tractors, among farmers and female spouses of farmers, Agricultural Health Study

| Exposure                                                      | Farmers                          |                          | Spouses of farmers               |                          |
|---------------------------------------------------------------|----------------------------------|--------------------------|----------------------------------|--------------------------|
|                                                               | Cases <sup>a</sup><br>n=281<br>N | RR <sup>b</sup> (95% CI) | Cases <sup>a</sup><br>n=160<br>N | RR <sup>b</sup> (95% CI) |
| <b>Diesel tractors<sup>c</sup></b>                            |                                  |                          |                                  |                          |
| No                                                            | 32                               | 1.00                     | 120                              | 1.00                     |
| ≥Monthly ≥ 1 season                                           | 25                               | 1.20 (0.77, 2.03)        | 33                               | 0.88 (0.54, 1.43)        |
| ≥Weekly ≥ 1 season                                            | 116                              | 1.07 (0.71, 1.62)        |                                  |                          |
| Daily in one season                                           | 51                               | 1.20 (0.74, 1.95)        |                                  |                          |
| Daily in both seasons                                         | 34                               | 1.38 (0.81, 2.37)        |                                  |                          |
| <i>p</i> for trend <sup>d</sup>                               |                                  | 0.27                     |                                  |                          |
| <b>Gasoline tractors<sup>c</sup></b>                          |                                  |                          |                                  |                          |
| No                                                            | 90                               | 1.00                     | 128                              | 1.00                     |
| ≥Monthly ≥ 1 season                                           | 55                               | 0.87 (0.62, 1.23)        | 25                               | 0.67 (0.40, 1.15)        |
| ≥Weekly ≥ 1 season                                            | 89                               | 1.10 (0.81, 1.49)        |                                  |                          |
| Daily in one season                                           | 11                               | 0.94 (0.49, 1.79)        |                                  |                          |
| Daily in both seasons                                         | 13                               | 1.12 (0.61, 2.08)        |                                  |                          |
| <i>p</i> for trend <sup>d</sup>                               |                                  | 0.58                     |                                  |                          |
| <b>Combines or other types of crop harvesters<sup>c</sup></b> |                                  |                          |                                  |                          |
| No                                                            | 80                               | 1.00                     | 141                              | 1.00                     |
| 1-10 days                                                     | 53                               | 1.02 (0.70, 1.49)        | 10                               | 0.76 (0.38, 1.51)        |
| 11-30 days                                                    | 84                               | 0.98 (0.67, 1.43)        |                                  |                          |
| ≥ 31 days                                                     | 30                               | 0.74 (0.46, 1.18)        |                                  |                          |
| <i>p</i> for trend <sup>d</sup>                               |                                  | 0.27                     |                                  |                          |
| <b>Trucks<sup>c</sup></b>                                     |                                  |                          |                                  |                          |
| No                                                            | 82                               | 1.00                     | 106                              | 1.00                     |
| ≥Monthly ≥ 1 season                                           | 40                               | 0.83 (0.56, 1.22)        | 46                               | 0.97 (0.66, 1.41)        |
| ≥Weekly ≥ 1 season                                            | 67                               | 0.87 (0.62, 1.22)        |                                  |                          |
| Daily in one season                                           | 14                               | 0.95 (0.53, 1.71)        |                                  |                          |
| Daily in both seasons                                         | 49                               | 0.73 (0.50, 1.08)        |                                  |                          |
| <i>p</i> for trend <sup>d</sup>                               |                                  | 0.16                     |                                  |                          |

<sup>a</sup> Case counts do not sum to total counts because of missing values for exposure variables

<sup>b</sup> For farmers, rate ratios were adjusted for age, pack-years (non-smokers, <20, 20-39, 40-59, ≥60, missing), state, race, level of education, current exposure to animals and stored grain (no, one exposure, both exposure), diesel tractor use (no, monthly, weekly, daily in one season, daily in both seasons) and gasoline tractor use (no, monthly, weekly, daily in one season, daily in both seasons); for spouses: rate ratios were adjusted for age, pack-years (non-smokers, <20, 20-39, ≥40, missing), level of education, exposure to farm animals in the year before enrollment, diesel tractor use (no, any) and gasoline tractor use (no, any)

<sup>c</sup> Test for trend, *p* value obtained by treating the categorical variable as ordinal

**Table S2.** Associations between driving farm equipment and the overall lung cancer risk, mutually adjusted for the use of diesel and gasoline tractors, by exposure to endotoxin-related activities, among farmers and female spouses of farmers, Agricultural Health Study

| Population                | Exposure                                   | Nonexposed to endotoxin-related activities <sup>a</sup> |                          | Exposed to endotoxin-related activities <sup>a</sup> |                          | <i>p</i> for interaction <sup>g</sup> |       |
|---------------------------|--------------------------------------------|---------------------------------------------------------|--------------------------|------------------------------------------------------|--------------------------|---------------------------------------|-------|
|                           |                                            | Cases <sup>b</sup><br>n                                 | RR <sup>c</sup> (95% CI) | Cases <sup>b</sup><br>n                              | RR <sup>c</sup> (95% CI) |                                       |       |
| Farmers                   | Diesel tractors                            | No/low <sup>d</sup>                                     | 70                       | 1.00                                                 | 103                      | 1.00                                  | 0.87  |
|                           |                                            | Intermediate <sup>e</sup>                               | 10                       | 0.99 (0.50, 1.97)                                    | 41                       | 1.15 (0.79, 1.67)                     |       |
|                           |                                            | High <sup>f</sup>                                       | 5                        | 1.45 (0.55, 3.82)                                    | 29                       | 1.24 (0.82, 1.88)                     |       |
|                           | Gasoline tractors                          | No/low <sup>d</sup>                                     | 80                       | 1.00                                                 | 154                      | 1.00                                  | 0.60  |
|                           |                                            | Intermediate <sup>e</sup> /high <sup>f</sup>            | 5                        | 1.27 (0.48, 3.38)                                    | 19                       | 0.94 (0.58, 1.54)                     |       |
|                           | Combines or other types of crop harvesters | 0 day                                                   | 45                       | 1.00                                                 | 35                       | 1.00                                  | 0.64  |
|                           |                                            | 1-30 days                                               | 28                       | 1.24 (0.75, 2.03)                                    | 109                      | 0.91 (0.61, 1.36)                     |       |
|                           |                                            | ≥31 days                                                | 6                        | 0.78 (0.32, 1.93)                                    | 24                       | 0.68 (0.39, 1.18)                     |       |
|                           | Trucks                                     | No/low <sup>d</sup>                                     | 61                       | 1.00                                                 | 128                      | 1.00                                  | 0.66  |
| Intermediate <sup>e</sup> |                                            | 4                                                       | 0.74 (0.26, 2.06)        | 10                                                   | 1.27 (0.66, 2.44)        |                                       |       |
| High <sup>f</sup>         |                                            | 16                                                      | 0.78 (0.44, 1.37)        | 33                                                   | 0.85 (0.57, 1.28)        |                                       |       |
| Spouses                   | Diesel tractors                            | No/<monthly                                             | 74                       | 1.00                                                 | 46                       | 1.00                                  | <0.01 |
|                           |                                            | ≥Monthly                                                | 19                       | 1.81 (0.98, 3.34)                                    | 14                       | 0.42 (0.21, 0.86)                     |       |
|                           | Gasoline tractors                          | No/<monthly                                             | 82                       | 1.00                                                 | 46                       | 1.00                                  | 0.37  |
|                           |                                            | ≥Monthly                                                | 11                       | 0.53 (0.25, 1.14)                                    | 14                       | 0.85 (0.42, 1.75)                     |       |
|                           | Combines or other types of crop harvesters | 0 day                                                   | 89                       | 1.00                                                 | 52                       | 1.00                                  | 0.20  |
|                           |                                            | ≥1 day                                                  | 3                        | 0.47 (0.14, 1.54)                                    | 7                        | 1.20 (0.50, 2.88)                     |       |
|                           | Trucks                                     | No/<monthly                                             | 71                       | 1.00                                                 | 35                       | 1.00                                  | 0.33  |
|                           |                                            | ≥Monthly                                                | 22                       | 0.81 (0.48, 1.36)                                    | 24                       | 1.18 (0.68, 2.05)                     |       |

<sup>a</sup> Endotoxin-related activities were defined by current exposure to animals or stored grain in farmers and exposure to animals in the year before enrollment in spouses

<sup>b</sup> Case counts do not sum to total counts because of missing values for exposure variables

<sup>c</sup> For farmers : rate ratios were adjusted for age, cigarette pack-years (non-smokers, <20, 20-39, 40-59, ≥60, missing), state, race, level of education, diesel tractor use (no/low, intermediate, high) and gasoline tractor use (no/low, intermediate/high); for spouses : rate ratios were adjusted for age, pack-years (non-smokers, <20, 20-39, ≥40, missing), level of education, diesel tractor use (no, any) and gasoline tractor use (no, any)

<sup>d</sup> No or low exposure was defined by a driving < daily in one season

<sup>e</sup> Intermediate exposure : daily driving in one season

<sup>f</sup> High exposure : daily driving in both seasons

<sup>g</sup> *p* for interaction was obtained from the likelihood ratio test by adding cross-product terms between each category of exposure and the variable reflecting potential exposure to endotoxins

**Table S3.** Associations between driving farm equipment and lung cancer histological subtypes, mutually adjusted for the use of diesel and gasoline tractors, among farmers and female spouses of farmers, Agricultural Health Study

| Population                                        | Exposure                        | Farmers                         |                          |                                 |                          |                                 |                          | Spouses                         |                          |
|---------------------------------------------------|---------------------------------|---------------------------------|--------------------------|---------------------------------|--------------------------|---------------------------------|--------------------------|---------------------------------|--------------------------|
|                                                   |                                 | Adenocarcinoma                  |                          | Squamous cell carcinoma         |                          | Small cell carcinoma            |                          | Adenocarcinoma                  |                          |
|                                                   |                                 | Cases <sup>a</sup><br>n=78<br>n | RR <sup>b</sup> (95% CI) | Cases <sup>a</sup><br>n=75<br>n | RR <sup>c</sup> (95% CI) | Cases <sup>a</sup><br>n=50<br>n | RR <sup>c</sup> (95% CI) | Cases <sup>a</sup><br>n=69<br>n | RR <sup>d</sup> (95% CI) |
| <b>Diesel tractors</b>                            |                                 |                                 |                          |                                 |                          |                                 |                          |                                 |                          |
|                                                   | No                              | 7                               | 1.00                     | 6                               | 1.00                     | 12                              | 1.00                     | 46                              | 1.00                     |
|                                                   | ≥Monthly ≥ 1 season             | 7                               | 1.58 (0.55, 4.57)        | 8                               | 2.00 (0.68, 5.85)        |                                 |                          | 17                              | 1.01 (0.49, 2.09)        |
|                                                   | ≥Weekly ≥ 1 season              | 31                              | 1.43 (0.60, 3.40)        | 34                              | 1.57 (0.63, 3.90)        | 23                              | 0.96 (0.45, 2.04)        |                                 |                          |
|                                                   | Daily in one season             | 19                              | 2.32 (0.90, 5.96)        | 12                              | 1.41 (0.49, 4.03)        | 5                               | 0.47 (0.15, 1.46)        |                                 |                          |
|                                                   | Daily in both seasons           | 11                              | 2.97 (1.06, 8.36)        | 7                               | 1.31 (0.40, 4.28)        | 7                               | 0.92 (0.32, 2.66)        |                                 |                          |
|                                                   | <i>p</i> for trend <sup>e</sup> |                                 | 0.02                     |                                 | 0.89                     |                                 | 0.54                     |                                 |                          |
| <b>Gasoline tractors</b>                          |                                 |                                 |                          |                                 |                          |                                 |                          |                                 |                          |
|                                                   | No                              | 24                              | 1.00                     | 25                              | 1.00                     | 20                              | 1.00                     | 49                              | 1.00                     |
|                                                   | ≥Monthly ≥ 1 season             | 16                              | 0.95 (0.50, 1.80)        | 15                              | 0.82 (0.43, 1.58)        | 8                               | 0.59 (0.26, 1.36)        | 14                              | 0.94 (0.44, 2.00)        |
|                                                   | ≥Weekly ≥ 1 season              | 27                              | 1.28 (0.72, 2.27)        | 23                              | 0.95 (0.52, 1.71)        | 11                              | 0.64 (0.30, 1.36)        |                                 |                          |
|                                                   | Daily ≥ 1 season                | 8                               | 1.25 (0.54, 2.89)        | 4                               | 0.61 (0.20, 1.82)        | 8                               | 1.92 (0.77, 4.77)        |                                 |                          |
|                                                   | <i>p</i> for trend <sup>e</sup> |                                 | 0.38                     |                                 | 0.55                     |                                 | 0.81                     |                                 |                          |
| <b>Combines or other types of crop harvesters</b> |                                 |                                 |                          |                                 |                          |                                 |                          |                                 |                          |
|                                                   | Never                           | 26                              | 1.00                     | 17                              | 1.00                     | 14                              | 1.00                     | 57                              | 1.00                     |
|                                                   | 1-10 days                       | 11                              | 0.67 (0.31, 1.42)        | 22                              | 1.81 (0.90, 3.64)        | 9                               | 1.04 (0.41, 2.59)        | 6                               | 1.01 (0.40, 2.52)        |
|                                                   | 11-30 days                      | 28                              | 0.97 (0.50, 1.90)        | 18                              | 0.90 (0.41, 1.97)        | 16                              | 1.39 (0.57, 3.39)        |                                 |                          |
|                                                   | ≥31 days                        | 10                              | 0.75 (0.33, 1.72)        | 8                               | 0.89 (0.35, 2.31)        | 5                               | 0.85 (0.27, 2.67)        |                                 |                          |
|                                                   | <i>p</i> for trend <sup>e</sup> |                                 | 0.71                     |                                 | 0.45                     |                                 | 0.94                     |                                 |                          |
| <b>Trucks</b>                                     |                                 |                                 |                          |                                 |                          |                                 |                          |                                 |                          |
|                                                   | No                              | 24                              | 1.00                     | 23                              | 1.00                     | 16                              | 1.00                     | 45                              | 1.00                     |
|                                                   | ≥Monthly ≥ 1 season             | 9                               | 0.65 (0.30, 1.42)        | 11                              | 0.75 (0.36, 1.56)        | 9                               | 0.91 (0.40, 2.07)        | 17                              | 0.74 (0.40, 1.36)        |
|                                                   | ≥Weekly ≥ 1 season              | 22                              | 1.00 (0.55, 1.83)        | 15                              | 0.64 (0.32, 1.25)        | 11                              | 0.65 (0.29, 1.47)        |                                 |                          |
|                                                   | Daily ≥ 1 season                | 18                              | 0.77 (0.39, 1.51)        | 16                              | 0.71 (0.35, 1.43)        | 10                              | 0.45 (0.19, 1.10)        |                                 |                          |
|                                                   | <i>p</i> for trend <sup>e</sup> |                                 | 0.64                     |                                 | 0.25                     |                                 | 0.07                     |                                 |                          |

<sup>a</sup> Case counts do not sum to total case counts because of missing values for exposure variables

<sup>b</sup> Adjusted for age (<55,55-59,60-64,65-69,>70), pack-years (non smokers, <20, 20-39,40-59, ≥60, missing), state, race, level of education (less than high school, high school, above high school, unknown), current exposure to animals and stored grain (no, one exposure, both exposure), diesel tractor use (no, monthly, weekly, daily in one season, daily in both seasons) and gasoline tractor use (no, monthly, weekly, daily in at least one season)

<sup>c</sup> Adjusted for age (<55,55-59,60-64,65-69,>70), pack-years (non smokers or <20, 20-39,40-59, ≥60, missing), state, race, level of education (less than high school, high school, above high school, unknown), current exposure to animals and stored grain (No, one exposure, both exposure), diesel tractor use (no, monthly, weekly, daily in one season, daily in both seasons) and gasoline tractor use (no, monthly, weekly, daily in at least one season)

<sup>d</sup> Adjusted for age (<55,55-59,60-64,65-69,>70), pack-years (non smokers, <20, 20-39, ≥40, missing), level of education (high school or less, above high school, unknown), exposure to farm animals in the year before enrollment, diesel tractor use (no, any) and gasoline tractor use (no, any)

<sup>e</sup> Test for trend, *p* value obtained by treating the categorical variable as ordinal

**Table S4.** Associations between driving farm equipment and risk for lung adenocarcinoma, mutually adjusted for the use of diesel and gasoline tractors, by exposure to endotoxin-related activities, among farmers and female spouses of farmers, Agricultural Health Study

| Population                                   | Exposure                                      |                                              | Nonexposed to endotoxin<br>-related activities <sup>a</sup> |                          | Exposed to endotoxin<br>-related activities <sup>a</sup> |                          | <i>p</i> for interaction <sup>h</sup> |
|----------------------------------------------|-----------------------------------------------|----------------------------------------------|-------------------------------------------------------------|--------------------------|----------------------------------------------------------|--------------------------|---------------------------------------|
|                                              |                                               |                                              | Cases <sup>b</sup><br>N                                     | RR <sup>c</sup> (95% CI) | Cases <sup>b</sup><br>N                                  | RR <sup>c</sup> (95% CI) |                                       |
| Farmers                                      | Diesel tractors                               | No/low <sup>d</sup>                          | 18                                                          | 1.00                     | 27                                                       | 1.00                     | 0.24                                  |
|                                              |                                               | Intermediate <sup>e</sup>                    | 3                                                           | 1.33 (0.38, 4.74)        | 16                                                       | 1.72 (0.91, 3.27)        |                                       |
|                                              |                                               | High <sup>f</sup>                            | 4                                                           | 4.09 (1.18, 14.18)       | 7                                                        | 1.23 (0.52, 2.88)        |                                       |
|                                              | Gasoline tractors                             | No/low <sup>d</sup>                          | 23                                                          | 1.00                     | 45                                                       | 1.00                     | 0.35                                  |
|                                              |                                               | Intermediate <sup>e</sup> /high <sup>f</sup> | 3                                                           | 1.79 (0.45, 7.16)        | 5                                                        | 0.79 (0.31, 2.04)        |                                       |
|                                              | Combines or other types<br>of crop harvesters | 0 day                                        | 11                                                          | 1.00                     | 14                                                       | 1.00                     | 0.09                                  |
|                                              |                                               | 1-30 days                                    | 9                                                           | 1.56 (0.62, 3.91)        | 30                                                       | 0.56 (0.28, 1.12)        |                                       |
|                                              |                                               | ≥31 days                                     | 4                                                           | 1.97 (0.54, 7.16)        | 6                                                        | 0.37 (0.14, 1.02)        |                                       |
|                                              | Trucks                                        | No/low <sup>d</sup>                          | 16                                                          | 1.00                     | 39                                                       | 1.00                     | 0.74                                  |
| Intermediate <sup>e</sup> /high <sup>f</sup> |                                               | 7                                            | 0.97 (0.39, 2.45)                                           | 11                       | 0.80 (0.39, 1.62)                                        |                          |                                       |
| Spouses <sup>g</sup>                         | Diesel tractors                               | No/<monthly                                  | 29                                                          | 1.00                     | 17                                                       | 1.00                     | 0.03                                  |
|                                              |                                               | ≥Monthly                                     | 9                                                           | 2.16 (0.88, 5.33)        | 8                                                        | 0.47 (0.17, 1.32)        |                                       |
|                                              | Gasoline tractors                             | No/<monthly                                  | 33                                                          | 1.00                     | 16                                                       | 1.00                     | 0.16                                  |
|                                              |                                               | ≥Monthly                                     | 5                                                           | 0.54 (0.17, 1.66)        | 9                                                        | 1.57 (0.58, 4.27)        |                                       |
|                                              | Trucks                                        | No/<monthly                                  | 30                                                          | 1.00                     | 15                                                       | 1.00                     | 0.21                                  |
|                                              |                                               | ≥Monthly                                     | 8                                                           | 0.78 (0.43, 1.41)        | 9                                                        | 0.25 (0.03, 1.96)        |                                       |

<sup>a</sup> Endotoxin-related activities were defined by current exposure to animals or stored grain in farmers and current exposure to animals in spouses

<sup>b</sup> Case counts do not sum to total counts because of missing values for exposure variables

<sup>c</sup> For farmers : Rate ratios were adjusted for age, pack-years (non smokers, <20, 20-39,40-59, ≥60, missing), state, race, level of education(less than high school, high school, above high school, unknown), diesel tractor use (no/low, intermediate, high) and gasoline tractor use (no/low, intermediate/high); for spouses : rate ratios were adjusted for age, pack-years (non-smokers, <20, 20-39, ≥40, missing), level of education (high school or less, above high school, unknown), diesel tractor use (no, any) and gasoline tractor use (no, any)

<sup>d</sup> No or low exposure was defined by a driving < daily in one season

<sup>e</sup> Intermediate exposure : daily driving in one season

<sup>f</sup> High exposure : daily driving in both seasons

<sup>h</sup> *p* for interaction was obtained from the likelihood ratio test by adding cross-product terms between each category of exposure and the variable reflecting potential exposure to endotoxins

<sup>g</sup> Associations were not shown for use of combines or other types of crop harvesters for spouses due to too few exposed cases (1 case among spouses not exposed to farm animals, 5 cases among those exposed to farm animals)
